# Supplementary material
Source: MDPI journal article supplement (https://www.mdpi.com/2311-5521/8/3/93)
Supplement: s1 [file s1]

## Supplementary Materials

Constants of considered problem:

In the case:  $a^2 - 4b > 0$ , constants are:

$$r_1 = \frac{1}{2}(a + \sqrt{a^2 - 4b}), \quad r_2 = \frac{1}{2}(a - \sqrt{a^2 - 4b}), \quad \delta_1 = +\sqrt{r_1}, \quad \delta_2 = -\sqrt{r_1}, \quad \delta_3 = +\sqrt{r_2}, \quad \delta_4 = -\sqrt{r_2},$$

$$\mathfrak{T}_1 = \frac{1}{E} \left( \frac{B^*}{A} - D^* \right), \quad \mathfrak{T}_2 = \frac{1}{EA}, \quad \mathcal{D}_i = \delta_i (\mathfrak{T}_1 - \delta_i^2 \mathfrak{T}_2) \quad i = 1, 2, 3, 4,$$

$$C_1 = -\frac{1}{\mathcal{D}_1} (\mathcal{D}_2 C_2 + \mathcal{D}_3 C_3 + \mathcal{D}_4 C_4), \quad C_2 = -\frac{1}{\mathfrak{R}_1} (\mathfrak{R}_2 C_3 + \mathfrak{R}_3 C_4),$$

$$C_3 = -\frac{1}{S_1} \left( S_2 C_4 + \frac{d}{b} \right), \quad C_4 = \frac{\mathcal{T}_1 - S_1}{\mathcal{T}_2 S_1 - \mathcal{T}_1 S_2} \frac{d}{b},$$

$$\mathcal{M}_i = 1 - \frac{\mathcal{D}_{i+1}}{\mathcal{D}_i} \quad i = 1, 2, 3, \quad \mathcal{N}_i = \exp \delta_{i+1} - \frac{\mathcal{D}_{i+1}}{\mathcal{D}_i} \exp \delta_i \quad i = 1, 2, 3, \quad \mathfrak{R}_i = \mathcal{D}_{i+1} (\exp \delta_{i+1} - \exp \delta_i) \quad i = 1, 2, 3,$$

$$\mathcal{T}_i = \mathcal{N}_{i+1} - \frac{\mathcal{N}_1}{\mathfrak{R}_1} \mathfrak{R}_{i+1} \quad i = 1, 2, \quad S_i = \mathcal{M}_{i+1} - \frac{\mathcal{M}_1}{\mathfrak{R}_1} \mathfrak{R}_{i+1} \quad i = 1, 2,$$

$$\begin{aligned} {}^1\mathcal{A} &= \frac{{}^1C}{4\delta_1^2} + \frac{{}^2C}{4\delta_2^2} + \frac{{}^3C}{4\delta_3^2} + \frac{{}^4C}{4\delta_4^2} + \frac{{}^2D}{(\delta_1 + \delta_3)^2} + \frac{{}^3D}{(\delta_1 + \delta_4)^2} + \\ &+ \frac{{}^1E}{(\delta_2 + \delta_3)^2} + \frac{{}^2E}{(\delta_2 + \delta_4)^2} + \frac{{}^1F}{\delta_1^2} + \frac{{}^2F}{\delta_2^2} + \frac{{}^3F}{\delta_3^2} + \frac{{}^4F}{\delta_4^2}, \end{aligned}$$

$$\begin{aligned} {}^1\mathcal{B}_2 &= \frac{1}{4\delta_1^2} {}^1C \exp(2\delta_1) + \frac{1}{4\delta_2^2} {}^2C \exp(2\delta_2) + \frac{1}{4\delta_3^2} {}^3C \exp(2\delta_3) + \frac{1}{4\delta_4^2} {}^4C \exp(2\delta_4) + \\ &+ \frac{1}{2} {}^1D + \frac{{}^2D}{(\delta_1 + \delta_3)^2} \exp(\delta_1 + \delta_3) + \frac{{}^3D}{(\delta_1 + \delta_4)^2} \exp(\delta_1 + \delta_4) + \frac{{}^1E}{(\delta_2 + \delta_3)^2} \exp(\delta_2 + \delta_3) + \\ &+ \frac{{}^2E}{(\delta_2 + \delta_4)^2} \exp(\delta_2 + \delta_4) + \frac{1}{2} {}^3E + \frac{1}{\delta_1^2} {}^1F \exp(\delta_1) + \frac{1}{\delta_2^2} {}^2F \exp(\delta_2) + \frac{1}{\delta_3^2} {}^3F \exp(\delta_3) + \\ &+ \frac{1}{\delta_4^2} {}^4F \exp(\delta_4) + \frac{1}{2} {}^5F, \end{aligned}$$

$${}^1H_2 = -{}^1\mathcal{A}, \quad {}^1H_1 = {}^1\mathcal{A} - {}^1\mathcal{B}_2 - \frac{1}{\text{Pr } Ec},$$

$${}^iC = C_i^2 \left[ (1+K) \delta_i^2 + (Ha^2 + R) \right] \quad i=1,2,3,4, \quad {}^iD = 2C_1C_{i+1} \left[ (1+K) \delta_1 \delta_{i+1} + (Ha^2 + R) \right] \quad i=1,2,3,$$

$${}^iE = 2C_2C_{i+2} \left[ (1+K) \delta_2 \delta_{i+2} + (Ha^2 + R) \right] \quad i=1,2, \quad {}^3E = 2C_3C_4 \left[ (1+K) \delta_3 \delta_4 + (Ha^2 + R) \right],$$

$${}^iF = 2 \frac{d}{b} (Ha^2 + R) C_i \quad i=1,2,3,4, \quad {}^5F = \frac{d^2}{b^2} (Ha^2 + R).$$

In the case:  $a^2 - 4b = 0$ , constants are:

$$r_1 = \frac{1}{2} \left( a + \sqrt{a^2 - 4b} \right), \quad r_2 = \frac{1}{2} \left( a - \sqrt{a^2 - 4b} \right), \quad \xi_1 = \sqrt{\frac{1}{2}} a, \quad \xi_2 = -\sqrt{\frac{1}{2}} a,$$

$$\mathfrak{T}_1 = \frac{1}{E} \left( \frac{B^*}{A} - D^* \right), \quad \mathfrak{T}_2 = \frac{1}{EA},$$

$$C_5 = - \left( C_7 + \frac{d}{b} \right), \quad C_6 = \frac{1}{F_1} (E_4 - E_3 C_7 - F_2 C_8), \quad C_7 = - \frac{1}{E_7} (E_8 C_8 + E_9), \quad C_8 = \frac{E_9 E_{10} - E_7 E_{12}}{E_7 E_{11} - E_8 E_{10}},$$

$$F_i = \mathfrak{T}_1 - 3\mathfrak{T}_2 \xi_i^2 \quad i=1,2, \quad E_i = \xi_i \left( \mathfrak{T}_1 - \mathfrak{T}_2 \xi_i^2 \right) \quad i=1,2,$$

$$G_i = \xi_i \left( \mathfrak{T}_1 - \xi_i^2 \mathfrak{T}_2 \right) \exp \xi_i \quad i=1,2, \quad H_i = [\mathfrak{T}_1 (1 + \xi_i) - \mathfrak{T}_2 \xi_i^2 (3 + \xi_i)] \exp \xi_i \quad i=1,2,$$

$$E_3 = E_2 - E_1, \quad E_4 = E_1 \frac{d}{b}, \quad E_5 = \exp \xi_2 - \exp \xi_1, \quad E_6 = (1 - \exp \xi_1) \frac{d}{b}, \quad G_3 = G_2 - G_1, \quad G_4 = G_1 \frac{d}{b},$$

$$E_7 = E_5 - \frac{E_3}{F_1} \exp \xi_1, \quad E_8 = \exp \xi_2 - \frac{F_2}{F_1} \exp \xi_1, \quad E_9 = E_6 + \frac{E_4}{F_1} \exp \xi_1, \quad E_{10} = G_3 - \frac{H_1}{F_1} E_3, \quad E_{11} = H_2 - \frac{H_1}{F_1} F_2,$$

$$E_{12} = \frac{H_1}{F_1} E_4 - G_4, \quad E_{13} = E_1 C_5 + F_1 C_6, \quad E_{14} = E_1 C_6, \quad E_{15} = E_2 C_7 + F_2 C_8, \quad E_{16} = E_2 C_8,$$

$${}^2\mathfrak{Q}_1 = \Omega_{28} + \Omega_{31} + \Omega_{34}^* + \Omega_{36}^*,$$

$${}^2\mathfrak{B}_2 = (\Omega_{28} + \Omega_{29} + \Omega_{30}) \exp(2\xi_1) + (\Omega_{31} + \Omega_{32} + \Omega_{33}) \exp(2\xi_2) + \\ + (\Omega_{34}^* + \Omega_{35}^*) \exp(\xi_1) + (\Omega_{36}^* + \Omega_{37}^*) \exp(\xi_2) + \Omega_{38}^* + \Omega_{39}^* + \Omega_{40}^*,$$

$${}^2H_1 = {}^2\mathfrak{B}_1 - {}^2\mathfrak{B}_2 - \frac{1}{\text{Pr} Ec}, \quad {}^2H_2 = -{}^2\mathfrak{Q}_1,$$

$$\Omega_1 = (1+K) \left( C_6^2 + \xi_1^2 C_5^2 + 2C_5 C_6 \xi_1 \right) + (Ha^2 + R) C_5^2, \quad \Omega_2 = (1+K) \left( 2C_5 C_6 \xi_1^2 + 2\xi_1 C_6^2 \right) + 2(Ha^2 + R) C_5 C_6,$$

$$\Omega_3 = (1+K)\left(\xi_1^2 C_6^2 + (Ha^2 + R)C_6^2\right), \quad \Omega_4 = (1+K)\left(C_8^2 + \xi_2^2 C_7^2 + 2\xi_2 C_7 C_8\right) + C_7^2 (Ha^2 + R),$$

$$\Omega_5 = (1+K)\left(2C_7 C_8 \xi_2^2 + 2\xi_2 C_8^2\right) + 2C_7 C_8 (Ha^2 + R), \quad \Omega_6 = (1+K)\xi_2^2 C_8^2 + C_8^2 (Ha^2 + R),$$

$$\Omega_7 = (1+K)\left(2C_6 C_8 + 2C_6 C_7 \xi_2 + 2C_5 C_8 \xi_1 + 2\xi_1 \xi_2 C_5 C_7\right) + 2C_5 C_7 (Ha^2 + R),$$

$$\Omega_8 = (1+K)\left(2C_6 C_8 \xi_2 + 2C_6 C_8 \xi_1 + 2\xi_1 \xi_2 C_6 C_7 + 2\xi_1 \xi_2 C_5 C_8\right) + 2(Ha^2 + R)(C_6 C_7 + C_5 C_8),$$

$$\Omega_9 = (1+K)2\xi_1 \xi_2 C_6 C_8 + 2C_6 C_8 (Ha^2 + R), \quad \Omega_{10} = 2\frac{d}{b}(Ha^2 + R)C_5, \quad \Omega_{11} = 2\frac{d}{b}(Ha^2 + R)C_6,$$

$$\Omega_{12} = 2\frac{d}{b}(Ha^2 + R)C_7, \quad \Omega_{13} = 2\frac{d}{b}(Ha^2 + R)C_8, \quad \Omega_{14} = \frac{d^2}{b^2}(Ha^2 + R), \quad \Omega_{15} = \frac{\Omega_1}{2\xi_1} - \frac{\Omega_2}{4\xi_1^2} + \frac{\Omega_3}{4\xi_1^3},$$

$$\Omega_{16} = \frac{\Omega_2}{2\xi_1} - \frac{\Omega_3}{2\xi_1^2}, \quad \Omega_{17} = \frac{\Omega_3}{2\xi_1}, \quad \Omega_{18} = \frac{\Omega_4}{2\xi_2} - \frac{\Omega_5}{4\xi_2^2} + \frac{\Omega_6}{4\xi_2^3}, \quad \Omega_{19} = \frac{\Omega_5}{2\xi_2} - \frac{\Omega_6}{2\xi_2^2}, \quad \Omega_{20} = \frac{\Omega_6}{2\xi_2}, \quad \Omega_{21}^* = \frac{\Omega_{10}}{\xi_1} - \frac{\Omega_{11}}{\xi_1^2},$$

$$\Omega_{22}^* = \frac{\Omega_{11}}{\xi_1}, \quad \Omega_{23}^* = \frac{\Omega_{12}}{\xi_2} - \frac{\Omega_{13}}{\xi_2^2}, \quad \Omega_{24}^* = \frac{\Omega_{13}}{\xi_2}, \quad \Omega_{25} = \frac{\Omega_{11}}{\xi_1}, \quad \Omega_{26} = \frac{\Omega_{12}}{\xi_2} - \frac{\Omega_{13}}{\xi_2^2}, \quad \Omega_{27} = \frac{\Omega_{13}}{\xi_2},$$

$$\Omega_{28} = \frac{\Omega_{15}}{2\xi_1} - \frac{\Omega_{16}}{4\xi_1^2} + \frac{\Omega_{17}}{4\xi_1^3}, \quad \Omega_{29} = \frac{\Omega_{16}}{2\xi_1} - \frac{\Omega_{17}}{2\xi_1^2}, \quad \Omega_{30} = \frac{\Omega_{17}}{2\xi_1}, \quad \Omega_{31} = \frac{\Omega_{18}}{2\xi_2} - \frac{\Omega_{19}}{4\xi_2^2} + \frac{\Omega_{20}}{4\xi_2^3}, \quad \Omega_{32} = \frac{\Omega_{19}}{2\xi_2} - \frac{\Omega_{20}}{2\xi_2^2},$$

$$\Omega_{33} = \frac{\Omega_{20}}{2\xi_2}, \quad \Omega_{34}^* = \frac{\Omega_{21}^*}{\xi_1} - \frac{\Omega_{22}^*}{\xi_1^2}, \quad \Omega_{35}^* = \frac{\Omega_{22}^*}{\xi_1}, \quad \Omega_{36}^* = \frac{\Omega_{23}^*}{\xi_2} - \frac{\Omega_{24}^*}{\xi_2^2}, \quad \Omega_{37}^* = \frac{\Omega_{24}^*}{\xi_2}, \quad \Omega_{38}^* = \frac{\Omega_7 + \Omega_{14}}{2},$$

$$\Omega_{39}^* = \frac{\Omega_8}{6}, \quad \Omega_{40}^* = \frac{\Omega_9}{12}.$$

In the case:  $a^2 - 4b < 0$ , constants are:

$$r_1^* = \frac{1}{2}\left(a + i\sqrt{4b - a^2}\right), \quad r_2^* = \frac{1}{2}\left(a - i\sqrt{4b - a^2}\right), \quad \alpha = \frac{1}{2}a, \quad \beta = \frac{1}{2}\sqrt{4b - a^2}, \quad R = \sqrt{\alpha^2 + \beta^2},$$

$$\alpha_1 = \sqrt{R} \cos \frac{\theta_1}{2}, \quad \beta_1 = \sqrt{R} \sin \frac{\theta_1}{2}, \quad \theta_1 = \arctg \frac{\beta}{\alpha},$$

$$\mathfrak{T}_1 = \frac{1}{E} \left( \frac{B^*}{A} - D^* \right), \quad \mathfrak{T}_2 = \frac{1}{EA},$$

$$\eta_1 = \alpha_1 + i\beta_1, \quad \eta_2 = -\alpha_1 - i\beta_1, \quad \eta_3 = \alpha_1 - i\beta_1, \quad \eta_4 = -\alpha_1 + i\beta_1,$$

$${}^3\mathcal{E}_1 = \left[ \frac{1}{2\alpha_1} \Omega_{45} + \frac{1}{2} (\Omega_{47}\chi_1 - \Omega_{49}\chi_2) \right] + \left[ \frac{1}{2\alpha_1} \Omega_{46} - \frac{1}{2} (\Omega_{48}\chi_1 + \Omega_{50}\chi_2) \right] - \\ - \frac{1}{2\beta_1} \Omega_{52} + (\Omega_{53}\chi_1 - \Omega_{55}\chi_2) + (\Omega_{54}\chi_1 - \Omega_{56}\chi_2),$$

$${}^3\mathcal{E}_2 = \left[ \frac{1}{2\alpha_1} \Omega_{45} + \frac{1}{2} (\chi_1 \Omega_{47} - \chi_2 \Omega_{49}) \cos(2\beta_1) + \frac{1}{2} (\chi_2 \Omega_{47} + \chi_1 \Omega_{49}) \sin(2\beta_1) \right] \exp(2\alpha_1) + \\ + \left[ \frac{1}{2\alpha_1} \Omega_{46} - \frac{1}{2} (\chi_1 \Omega_{48} + \chi_2 \Omega_{50}) \cos(2\beta_1) + \frac{1}{2} (\chi_2 \Omega_{48} - \chi_1 \Omega_{50}) \sin(2\beta_1) \right] \exp(-2\alpha_1) - \\ - \frac{1}{2\beta_1} \Omega_{51} \sin(2\beta_1) - \frac{1}{2\beta_1} \Omega_{52} \cos(2\beta_1) + [(\Omega_{53}\chi_1 - \Omega_{55}\chi_2) \cos(\beta_1) + \\ + (\Omega_{53}\chi_2 + \Omega_{55}\chi_1) \sin(\beta_1)] \exp(\alpha_1) + [(\Omega_{54}\chi_1 - \Omega_{56}\chi_2) \cos(\beta_1) - \\ - (\Omega_{54}\chi_2 + \Omega_{56}\chi_1) \sin(\beta_1)] \exp(-\alpha_1) + \frac{1}{2} \Omega_{57},$$

$$\Omega_{41} = \alpha_1 C_{10} - \beta_1 C_9, \quad \Omega_{42} = \beta_1 C_{10} + \alpha_1 C_9, \quad \Omega_{43} = \beta_1 C_{12} - \alpha_1 C_{11}, \quad \Omega_{44} = \alpha_1 C_{12} + \beta_1 C_{11},$$

$$\Omega_{45} = \frac{1}{4\alpha_1} \left[ (1+K)(\Omega_{41}^2 + \Omega_{42}^2) + (Ha^2 + R)(C_9^2 + C_{10}^2) \right],$$

$$\Omega_{46} = \frac{1}{4\alpha_1} \left[ (1+K)(\Omega_{43}^2 + \Omega_{44}^2) + (Ha^2 + R)(C_{11}^2 + C_{12}^2) \right],$$

$$\Omega_{47} = \frac{1}{4} \frac{\alpha_1}{\alpha_1^2 + \beta_1^2} \left[ (1+K)(\Omega_{42}^2 - \Omega_{41}^2) + (Ha^2 + R)(C_9^2 - C_{10}^2) \right] - \frac{1}{2} \frac{\beta_1}{\alpha_1^2 + \beta_1^2} \left[ (1+K)\Omega_{41}\Omega_{42} + (Ha^2 + R)C_9C_{10} \right],$$

$$\Omega_{48} = \frac{1}{4} \frac{\alpha_1}{\alpha_1^2 + \beta_1^2} \left[ (1+K)(\Omega_{44}^2 - \Omega_{43}^2) + (Ha^2 + R)(C_{12}^2 - C_{11}^2) \right] + \frac{1}{2} \frac{\beta_1}{\alpha_1^2 + \beta_1^2} \left[ (1+K)\Omega_{43}\Omega_{44} - (Ha^2 + R)C_{11}C_{12} \right],$$

$$\Omega_{49} = \frac{1}{2} \frac{\alpha_1}{\alpha_1^2 + \beta_1^2} \left[ (1+K)\Omega_{41}\Omega_{42} + (Ha^2 + R)C_9C_{10} \right] + \frac{1}{4} \frac{\beta_1}{\alpha_1^2 + \beta_1^2} \left[ (1+K)(\Omega_{42}^2 - \Omega_{41}^2) + (Ha^2 + R)(C_9^2 - C_{10}^2) \right],$$

$$\Omega_{50} = \frac{1}{2} \frac{\alpha_1}{\alpha_1^2 + \beta_1^2} \left[ (1+K)\Omega_{43}\Omega_{44} - (Ha^2 + R)C_{11}C_{12} \right] + \frac{1}{4} \frac{\beta_1}{\alpha_1^2 + \beta_1^2} \left[ (1+K)(\Omega_{43}^2 - \Omega_{44}^2) + (Ha^2 + R)(C_{11}^2 - C_{12}^2) \right],$$

$$\Omega_{51} = \frac{1}{2\beta_1} \left[ (1+K)(\Omega_{41}\Omega_{43} - \Omega_{42}\Omega_{44}) + (Ha^2 + R)(C_9C_{12} + C_{10}C_{11}) \right],$$

$$\Omega_{52} = \frac{1}{2\beta_1} \left[ (1+K)(\Omega_{42}\Omega_{43} - \Omega_{41}\Omega_{44}) + (Ha^2 + R)(C_9C_{11} - C_{10}C_{12}) \right],$$

$$\Omega_{53} = 2 \frac{d}{b} (Ha^2 + R) \left( C_9 \frac{\alpha_1}{\alpha_1^2 + \beta_1^2} - C_{10} \frac{\beta_1}{\alpha_1^2 + \beta_1^2} \right), \quad \Omega_{54} = 2 \frac{d}{b} (Ha^2 + R) \left( C_{11} \frac{\alpha_1}{\alpha_1^2 + \beta_1^2} + C_{12} \frac{\beta_1}{\alpha_1^2 + \beta_1^2} \right),$$

$$\Omega_{55} = 2 \frac{d}{b} (Ha^2 + R) \left( C_9 \frac{\beta_1}{\alpha_1^2 + \beta_1^2} + C_{10} \frac{\alpha_1}{\alpha_1^2 + \beta_1^2} \right), \quad \Omega_{56} = 2 \frac{d}{b} (Ha^2 + R) \left( C_{11} \frac{\beta_1}{\alpha_1^2 + \beta_1^2} - C_{12} \frac{\alpha_1}{\alpha_1^2 + \beta_1^2} \right),$$

$$\Omega_{57} = (1 + K) (\Omega_{42} \Omega_{43} - \Omega_{41} \Omega_{44}) + (Ha^2 + R) \left( C_9 C_{11} + C_{10} C_{12} + \frac{d^2}{b^2} \right),$$

$$\chi_1 = \frac{\alpha_1}{\alpha_1^2 + \beta_1^2}, \quad \chi_2 = \frac{\beta_1}{\alpha_1^2 + \beta_1^2},$$

$$P = (\mathfrak{T}_1 - \mathfrak{T}_2 \alpha_1^2 + 3 \mathfrak{T}_2 \beta_1^2) \alpha_1, \quad Q = (\mathfrak{T}_1 - 3 \mathfrak{T}_2 \alpha_1^2 + \mathfrak{T}_2 \beta_1^2) \beta_1,$$

$$Q_1 = \cos \beta_1 \exp \alpha_1, \quad Q_2 = \sin \beta_1 \exp \alpha_1, \quad Q_3 = \cos \beta_1 \exp(-\alpha_1), \quad Q_4 = \sin \beta_1 \exp(-\alpha_1), \quad Q_5 = P_3 \alpha_1 + P_4 \beta_1,$$

$$Q_6 = P_4 \alpha_1 - P_3 \beta_1, \quad Q_7 = P_5 \alpha_1 + P_6 \beta_1, \quad Q_8 = P_5 \beta_1 - P_6 \alpha_1, \quad Q_9 = \frac{P}{Q} \frac{d}{b}, \quad Q_9^* = \frac{2P}{Q}, \quad Q_{10} = Q_3 - Q_1,$$

$$Q_{11} = (1 - Q_1) \frac{d}{b}, \quad Q_{12} = Q_6 + Q_7, \quad Q_{13} = Q_6 \frac{d}{b}, \quad Q_{14} = Q_4 - Q_2, \quad Q_{14}^* = Q_2 Q_9^* + Q_{10}, \quad Q_{15} = Q_{11} + Q_2 Q_9,$$

$$Q_{16} = Q_8 - Q_5, \quad Q_{16}^* = Q_5 Q_9^* - Q_{12}, \quad Q_{17} = Q_5 Q_9 - Q_{13},$$

$$P_1 = \mathfrak{T}_1 - \mathfrak{T}_2 \alpha_1^2 + \mathfrak{T}_2 \beta_1^2, \quad P_2 = 2 \mathfrak{T}_2 \alpha_1 \beta_1, \quad P_3 = (P_1 \sin \beta_1 - P_2 \cos \beta_1) \exp(\alpha_1),$$

$$P_4 = (P_2 \sin \beta_1 + P_1 \cos \beta_1) \exp(\alpha_1), \quad P_5 = (P_1 \cos \beta_1 - P_2 \sin \beta_1) \exp(-\alpha_1),$$

$$P_6 = (P_1 \sin \beta_1 + P_2 \cos \beta_1) \exp(-\alpha_1),$$

$$P_3^* = P_1 (\alpha_1 C_{10} - \beta_1 C_9) + P_2 (\beta_1 C_{10} + \alpha_1 C_9), \quad P_4^* = P_1 (\beta_1 C_{10} + \alpha_1 C_9) - P_2 (\alpha_1 C_{10} - \beta_1 C_9),$$

$$P_5^* = -[P_1 (\alpha_1 C_{12} + \beta_1 C_{11}) + P_2 (\beta_1 C_{12} - \alpha_1 C_{11})], \quad P_6^* = P_1 (\beta_1 C_{12} - \alpha_1 C_{11}) - P_2 (\alpha_1 C_{12} + \beta_1 C_{11}),$$

$$C_9 = -\left(C_{11} + \frac{d}{b}\right), \quad C_{10} = Q_9^* C_{11} + Q_9 - C_{12}, \quad C_{11} = -\frac{1}{Q_{14}^*} (Q_{14} C_{12} + Q_{15}), \quad C_{12} = \frac{Q_{16}^* Q_{15} - Q_{17} Q_{14}^*}{Q_{16} Q_{14}^* - Q_{16}^* Q_{14}}.$$
